# Supplementary material for: Methamphetamine abuse affects gene expression in brain-derived microglia of SIV-infected macaques to enhance inflammation and promote virus targets
Source: BMC Immunol. 2016 Apr 23;17:7. doi: 10.1186/s12865-016-0145-0 (PMC4841970; doi:10.1186/s12865-016-0145-0)
Supplement: Additional file 3: — Complete list of genes upregulated in microglia isolated from animals that are SIV-infected and Meth-treated compared to SIV-infected animals. Genes in this list are increased above 1.5-fold in MethSIV versus SIV, with a p value below 0.05. (XLSX 69 kb) [file 12865_2016_145_MOESM3_ESM.xlsx]

## Sheet: Sheet1
FeatureNum	ProbeName	GeneName	SystematicName	Description	SIV Ave	SIV SEM	SIV/Meth Ave	SIV/Meth SEM	SIVMeth/SIV FC	SIVMeth/SIV pvalue
12235	A_01_P003255	AQP9	ENSMMUT00000015705	ref|PREDICTED: Macaca mulatta aquaporin 9 (AQP9), mRNA [XM_001094912]	0.0195447	0.00123383	1.84134	1.8197	94.2113	0.02851
33751	A_01_P003147	OAS1	NM_001083949	ref|Macaca mulatta 2',5'-oligoadenylate synthetase 1, 40/46kDa (OAS1), mRNA [NM_001083949]	4.33548	2.10061	51.9567	3.35649	11.9841	5.3843e-05
33612	A_01_P1698551	MAMU-A1	AB444887	gb|Macaca mulatta Mamu-A mRNA for MHC class I antigen, partial cds, allele: Mamu-A1*10701. [AB444887]	4.73732	0.696015	24.5915	8.40922	5.19101	0.0378683
2477	A_01_P1681561	GPD1	ENSMMUT00000009156	gb|PREDICTED: Macaca mulatta glycerol-3-phosphate dehydrogenase 1 (soluble) (GPD1), mRNA [XM_001102726]	0.048297	0.0135276	0.178345	0.0515616	3.69267	0.0368337
30079	A_01_P018593	SERPINA1	ENSMMUT00000018772	gb|PREDICTED: Macaca mulatta serpin peptidase inhibitor, clade A (alpha-1 antiproteinase, antitrypsin), member 1, transcript variant 6 (SERPINA1), mRNA [XM_001099255]	41.6281	6.80826	148.409	18.2982	3.56511	0.00162564
24134	A_01_P017540	VSIG1	XM_001092052	ref|PREDICTED: Macaca mulatta V-set and immunoglobulin domain containing 1 (VSIG1), mRNA [XM_001092052]	0.0228768	0.00266541	0.0770797	0.0103391	3.36935	0.00200982
41884	A_01_P1671671	NAT2	NM_001044736	ref|Macaca mulatta N-acetyltransferase 2 (arylamine N-acetyltransferase) (NAT2), mRNA [NM_001044736]	0.274676	0.015113	0.850895	0.202859	3.09781	0.0197529
45016	A_01_P1768581	CD244	ENSMMUT00000024368	ref|PREDICTED: Macaca mulatta CD244 molecule, natural killer cell receptor 2B4, transcript variant 2 (CD244), mRNA [XM_001117630]	1.35673	0.456241	4.01689	0.789279	2.96072	0.0262864
10620	A_01_P012249	IRF5	ENSMMUT00000041831	ref|PREDICTED: Macaca mulatta Interferon Regulatory factor 5	0.0349415	0.00612508	0.0971593	0.0235622	2.78063	0.0314369
2893	A_01_P011866	TXNDC2	XR_014741	ref|PREDICTED: Macaca mulatta thioredoxin domain-containing protein 2-like (TXNDC2), miscRNA [XR_014741]	0.0366978	0.0103477	0.0976627	0.0200455	2.66127	0.0324077
15116	A_01_P011421	IL1RAPL1	XM_001094959	ref|PREDICTED: Macaca mulatta interleukin 1 receptor accessory protein-like 1 (IL1RAPL1), mRNA [XM_001094959]	0.030336	0.00573242	0.078704	0.0169596	2.59441	0.0276125
20842	A_01_P1731861	GRIN2B	ENSMMUT00000026857	ref|PREDICTED: Macaca mulatta glutamate receptor, ionotropic, N-methyl D-aspartate 2B (GRIN2B), mRNA [XM_001088140]	0.0174885	0.00075581	0.040034	0.00606249	2.28916	0.00717233
38063	A_01_P016827	ZSCAN1	NM_001190963	ref|Macaca mulatta zinc finger and SCAN domain containing 1 (ZSCAN1), mRNA [NM_001190963]	0.0213083	0.00110744	0.048761	0.00577257	2.28836	0.00274592
7243	A_01_P001390	GPR17	ENSMMUT00000005938	ref|PREDICTED: Macaca mulatta G protein-coupled receptor 17, transcript variant 2 (GPR17), mRNA [XM_001089377]	0.0183358	0.00075743	0.0397923	0.00783965	2.1702	0.0229201
1100	A_01_P010062	HIVEP3	ENSMMUT00000022785	ref|PREDICTED: Macaca mulatta human immunodeficiency virus type I enhancer binding protein 3, transcript variant 2 (HIVEP3), mRNA [XM_001085309]	0.855664	0.116661	1.82305	0.277691	2.13057	0.0158805
5717	A_01_P1790261	A_01_P1790261	A_01_P1790261	Unknown	0.0214335	0.00307434	0.0455777	0.00357863	2.12647	0.00369255
20210	A_01_P1748801	IDH2	ENSMMUT00000040197	ref|PREDICTED: Macaca mulatta isocitrate dehydrogenase 2 (NADP+), mitochondrial, transcript variant 2 (IDH2), mRNA [XM_002804936]	73.5535	6.98486	155.703	32.9743	2.11687	0.0357204
18103	A_01_P1823521	ENSMMUT00000022287	ENSMMUT00000022287	ens|sodium leak channel, non-selective [Source:HGNC Symbol;Acc:19082] [ENSMMUT00000022287]	0.049103	0.0114672	0.103802	0.0150014	2.11396	0.0315407
23032	A_01_P1802076	A_01_P1802076	A_01_P1802076	Unknown	0.0672772	0.0181137	0.142197	0.00876771	2.1136	0.0213043
39207	A_01_P1772711	A_01_P1772711	A_01_P1772711	Unknown	2.93849	0.441891	6.2071	1.18149	2.11234	0.0329019
35878	A_01_P1679716	ENSMMUT00000015282	ENSMMUT00000015282	ens|olfactory receptor, family 10, subfamily AB, member 1 pseudogene [Source:HGNC Symbol;Acc:14804] [ENSMMUT00000015282]	0.0200962	0.000930294	0.0423593	0.00983884	2.10782	0.0437847
34631	A_01_P1735936	TEX261	ENSMMUT00000002956	Unknown	3.60582	0.295137	7.58763	1.43625	2.10427	0.0244843
17381	A_01_P1766186	ENSMMUT00000011542	ENSMMUT00000011542	Unknown	0.0174425	0.000998593	0.0366597	0.00501928	2.10174	0.00698852
32025	A_01_P1715306	ENSMMUT00000027481	ENSMMUT00000027481	Unknown	0.0178305	0.000856026	0.0374703	0.00523291	2.10147	0.00721915
25063	A_01_P1682721	LRRTM4	ENSMMUT00000043428	Unknown	0.0177423	0.000911443	0.037169	0.00889365	2.09494	0.0492056
37757	A_01_P1723021	NOL6	ENSMMUT00000046328	Unknown	0.142011	0.0110144	0.29703	0.0339161	2.0916	0.0042319
650	A_01_P1820156	A_01_P1820156	A_01_P1820156	Unknown	0.0241503	0.00360441	0.050485	0.00208799	2.09045	0.00229432
14440	A_01_P1807161	A_01_P1807161	A_01_P1807161	Unknown	0.018931	0.00116842	0.039573	0.0083431	2.09038	0.0337585
33605	A_01_P1746961	ENSMMUT00000028497	ENSMMUT00000028497	Unknown	0.018355	0.000786301	0.038176	0.00891089	2.07987	0.0460786
19874	A_01_P1691246	CELA3B	NM_001195397	ref|Macaca mulatta chymotrypsin-like elastase family, member 3B (CELA3B), mRNA [NM_001195397]	0.0238338	0.00540956	0.0495533	0.00348944	2.07912	0.0146574
18473	A_01_P1820271	A_01_P1820271	A_01_P1820271	Unknown	0.024496	0.00456509	0.0508533	0.0100483	2.07599	0.0461057
24085	A_01_P010575	IDH2	ENSMMUT00000020809	ref|PREDICTED: Macaca mulatta isocitrate dehydrogenase 2 (NADP+), mitochondrial, transcript variant 2 (IDH2), mRNA [XM_002804936]	81.16	6.35668	168.438	38.6946	2.07538	0.0467598
7989	A_01_P000372	NLGN1	XM_001082898	ref|PREDICTED: Macaca mulatta neuroligin 1, transcript variant 4 (NLGN1), mRNA [XM_001082898]	0.020751	0.00135632	0.043057	0.00978593	2.07494	0.0441614
14196	A_01_P016621	TMEM196	ENSMMUT00000013421	ens|transmembrane protein 196 [Source:RefSeq peptide;Acc:NP_001181152] [ENSMMUT00000013421]	0.01735	0.000654473	0.0359737	0.00858546	2.07341	0.0495662
4316	A_01_P006465	ENSMMUT00000028430	ENSMMUT00000028430	ens|trichohyalin-like 1 [Source:HGNC Symbol;Acc:31796] [ENSMMUT00000028430]	0.021532	0.00139686	0.0446427	0.0047513	2.07332	0.0030192
10905	A_01_P1814381	A_01_P1814381	A_01_P1814381	Unknown	0.0194695	0.00249443	0.0403303	0.00451194	2.07146	0.00733539
32605	A_01_P1675661	EARS2	ENSMMUT00000039455	ref|PREDICTED: Macaca mulatta glutamyl-tRNA synthetase 2, mitochondrial (putative), transcript variant 1 (EARS2), mRNA [XM_001094401]	0.0250098	0.00561804	0.051773	0.00793965	2.07011	0.0359122
9771	A_01_P008496	PDYN	ENSMMUT00000013941	ens|Preprodynorphin [Source:UniProtKB/TrEMBL;Acc:Q2YEJ6] [ENSMMUT00000013941]	0.0292013	0.00667005	0.0602097	0.00695147	2.06189	0.0250122
6039	A_01_P1710166	MAPT	ENSMMUT00000001151	ens|Microtubule-associated protein tau [Source:UniProtKB/Swiss-Prot;Acc:P57786] [ENSMMUT00000001151]	0.0231595	0.0031117	0.047664	0.0037891	2.05808	0.00395493
33205	A_01_P1733556	LOC715676	ENSMMUT00000023613	Unknown	0.0178885	0.000865361	0.0368047	0.00538225	2.05745	0.0093903
19529	A_01_P1749256	ENSMMUT00000027565	ENSMMUT00000027565	Unknown	0.0176865	0.00101932	0.036358	0.00444715	2.05569	0.00499852
31977	A_01_P1766701	LOC693505	ENSMMUT00000028965	Unknown	0.0188135	0.000876739	0.038615	0.00891415	2.05252	0.0465494
9968	A_01_P1792271	A_01_P1792271	A_01_P1792271	Unknown	0.023459	0.00631474	0.0481027	0.000461318	2.0505	0.0216209
35127	A_01_P005733	CST8	ENSMMUT00000023159	Unknown	0.0191877	0.000824909	0.039307	0.00905862	2.04855	0.0463729
30036	A_01_P1725291	LOC722080	ENSMMUT00000010640	ref|PREDICTED: Macaca mulatta coiled-coil domain-containing protein 88B-like (LOC722080), mRNA [XM_001118276]	2.81708	0.710321	5.75301	0.563141	2.04219	0.0285189
17492	A_01_P1803686	A_01_P1803686	A_01_P1803686	Unknown	0.019211	0.00104194	0.039224	0.00537523	2.04175	0.00777631
39345	A_01_P1678896	C9orf71	NM_001193966	ref|Macaca mulatta chromosome 9 open reading frame 71 (C9orf71), mRNA [NM_001193966]	0.019351	0.00125195	0.0393997	0.00511144	2.03605	0.00682912
17055	A_01_P1785351	A_01_P1785351	A_01_P1785351	Unknown	0.017381	0.000969304	0.035353	0.00740547	2.034	0.0357318
16368	A_01_P011942	ENSMMUT00000011154	ENSMMUT00000011154	ens|pyroglutamylated RFamide peptide receptor [Source:HGNC Symbol;Acc:15565] [ENSMMUT00000011154]	0.0171523	0.000907801	0.034835	0.00811469	2.03093	0.049882
31173	A_01_P003926	LOC697827	ENSMMUT00000014526	ref|PREDICTED: Macaca mulatta olfactory receptor 6B2-like, transcript variant 2 (LOC697827), mRNA [XM_001088261]	0.0176985	0.000863027	0.0359393	0.0083711	2.03064	0.0496011
33548	A_01_P013846	LPAR3	ENSMMUT00000021590	ref|PREDICTED: Macaca mulatta lysophosphatidic acid receptor 3 (LPAR3), mRNA [XM_001107923]	0.035549	0.00426464	0.0720093	0.00571867	2.02564	0.00334475
39809	A_01_P1777841	A_01_P1777841	A_01_P1777841	Unknown	0.022007	0.00150813	0.044544	0.00594468	2.02408	0.00797626
17394	A_01_P1811906	LOC701524	XM_001089817	ref|PREDICTED: Macaca mulatta zinc finger homeobox protein 4-like (LOC701524), mRNA [XM_001089817]	0.0343875	0.00759768	0.0695253	0.0122261	2.02182	0.0494165
18569	A_01_P1705511	KLC3	ENSMMUT00000030806	Unknown	0.0174535	0.000763926	0.035273	0.00619935	2.02097	0.0195766
40163	A_01_P009295	SPHKAP	ENSMMUT00000018608	ref|PREDICTED: Macaca mulatta SPHK1 interactor, AKAP domain containing, transcript variant 2 (SPHKAP), mRNA [XM_001111587]	0.0193588	0.00100669	0.0390917	0.00874052	2.01933	0.0447068
30617	A_01_P1821976	VMO1	NM_001194053	ref|Macaca mulatta vitelline membrane outer layer 1 homolog (chicken) (VMO1), mRNA [NM_001194053]	575.756	65.2171	1162.32	238.475	2.01878	0.0406983
15099	A_01_P1694976	AF070918	AF070918	gb|Macaca mulatta tyrosine hydroxylase type 1 mRNA, partial cds. [AF070918]	0.0175518	0.000967149	0.035422	0.00743713	2.01815	0.0369093
36392	A_01_P019435	KRT20	XM_001101772	gb|PREDICTED: Macaca mulatta keratin 20 (KRT20), mRNA [XM_001101772]	0.0200927	0.0009359	0.0404687	0.00913793	2.01409	0.0461083
6491	A_01_P1690026	RUNX1	ENSMMUT00000002340	Unknown	0.294745	0.0388814	0.59344	0.102574	2.0134	0.0278616
12256	A_01_P1677731	ENSMMUT00000000447	ENSMMUT00000000447	Unknown	0.023485	0.00250534	0.0471533	0.0102915	2.00781	0.0483035
3311	A_01_P1797371	A_01_P1797371	A_01_P1797371	Unknown	0.0223897	0.00142441	0.0448713	0.0100637	2.0041	0.0472047
8752	A_01_P1746808	ENSMMUT00000006005	ENSMMUT00000006005	Unknown	0.027099	0.00404793	0.0542213	0.00164854	2.00086	0.00284505
4174	A_01_P1795276	A_01_P1795276	A_01_P1795276	Unknown	0.023168	0.00273519	0.0462433	0.00907836	1.996	0.0382231
20931	A_01_P1707771	LOC699537	ENSMMUT00000022039	ref|PREDICTED: Macaca mulatta hypothetical LOC699537 (LOC699537), mRNA [XM_001087997]	0.0173655	0.000772273	0.0346063	0.00648266	1.99282	0.0258239
6252	A_01_P1806481	A_01_P1806481	A_01_P1806481	Unknown	0.0213315	0.00342153	0.0424877	0.00501381	1.99178	0.0150767
31383	A_01_P1685366	FUCA2	ENSMMUT00000007556	gb|PREDICTED: Macaca mulatta fucosidase, alpha-L- 2, plasma (FUCA2), mRNA [XM_001091161]	4.5166	0.555112	8.9923	1.68537	1.99095	0.0346993
19612	A_01_P1809996	A_01_P1809996	A_01_P1809996	Unknown	0.0183442	0.00090076	0.0364157	0.00454666	1.98513	0.0059775
21348	A_01_P018748	PDHA2	ENSMMUT00000030064	ref|PREDICTED: Macaca mulatta pyruvate dehydrogenase (lipoamide) alpha 2 (PDHA2), mRNA [XM_001097880]	0.0176275	0.000741524	0.0348767	0.0069435	1.97854	0.0324097
37691	A_01_P1688171	LNX1	ENSMMUT00000024475	Unknown	0.654734	0.0857729	1.29377	0.108029	1.97603	0.0053264
29480	A_01_P1816496	LOC714561	XM_001104394	ref|PREDICTED: Macaca mulatta sodium/potassium/calcium exchanger 6-like (LOC714561), mRNA [XM_001104394]	0.17792	0.0178041	0.351047	0.0662563	1.97306	0.0330358
788	A_01_P010437	LOC696748	ENSMMUT00000020098	Unknown	249.666	33.5251	491.825	38.229	1.96993	0.00509407
6113	A_01_P1676736	WFDC5	NM_001168686	ref|Macaca mulatta WAP four-disulfide core domain 5 (WFDC5), mRNA [NM_001168686]	0.0267735	0.00497851	0.0526907	0.00060392	1.96802	0.00713039
21932	A_01_P018772	C11orf87	NM_001194288	ref|Macaca mulatta chromosome 11 open reading frame 87 (C11orf87), mRNA [NM_001194288]	0.0538233	0.00958164	0.105513	0.0182014	1.96036	0.0416433
33630	A_01_P1681286	TAS2R20	ENSMMUT00000029533	ens|Taste receptor type 2 [Source:UniProtKB/TrEMBL;Acc:Q50KE9] [ENSMMUT00000029533]	0.0454073	0.0106654	0.0889177	0.0111712	1.95823	0.0393328
32049	A_01_P1726096	ENSMMUT00000009572	ENSMMUT00000009572	ens|doublecortin domain containing 5 [Source:HGNC Symbol;Acc:24799] [ENSMMUT00000009572]	0.0220135	0.00353382	0.0430823	0.00452074	1.95709	0.0134757
19941	A_01_P1758706	ENSMMUT00000032272	ENSMMUT00000032272	Unknown	0.0211605	0.00239809	0.0413363	0.00447909	1.95347	0.00777231
18966	A_01_P1670406	TGIFLX	NM_001032888	ref|Macaca mulatta TGIF-like protein on the X (TGIFLX), mRNA [NM_001032888]	0.0204173	0.00235521	0.039825	0.00454754	1.95056	0.00921711
6167	A_01_P1708446	PFAS	ENSMMUT00000042242	Unknown	0.0805725	0.0057573	0.157016	0.0344391	1.94875	0.0493217
38308	A_01_P1812686	A_01_P1812686	A_01_P1812686	Unknown	0.0203715	0.0012844	0.0396463	0.00639533	1.94617	0.0179411
11951	A_01_P1702776	ENSMMUT00000023951	ENSMMUT00000023951	ens|nicalin [Source:HGNC Symbol;Acc:26923] [ENSMMUT00000023951]	0.702953	0.029872	1.36635	0.266369	1.94373	0.0322562
8833	A_01_P1809336	A_01_P1809336	A_01_P1809336	Unknown	2.02393	0.20009	3.92501	0.60399	1.9393	0.0191119
19868	A_01_P1673611	NUMBL	ENSMMUT00000005998	ref|PREDICTED: Macaca mulatta numb homolog (Drosophila)-like (NUMBL), mRNA [XM_001091792]	0.0238575	0.00415697	0.0461587	0.00115045	1.93477	0.00670451
20040	A_01_P1738286	CLVS1	ENSMMUT00000012257	Unknown	0.0183278	0.000988497	0.0353687	0.00526942	1.92979	0.0134865
9080	A_01_P1744241	ENSMMUT00000032907	ENSMMUT00000032907	ens|glucagon-like peptide 1 receptor [Source:HGNC Symbol;Acc:4324] [ENSMMUT00000032907]	0.100731	0.00141329	0.19438	0.0376089	1.92971	0.0310837
32848	A_01_P1822441	HOXB8	NM_001190887	ref|Macaca mulatta homeobox B8 (HOXB8), mRNA [NM_001190887]	0.0179732	0.000953292	0.0345803	0.00661361	1.92399	0.0322269
6442	A_01_P018554	ENSMMUT00000019414	ENSMMUT00000019414	ens|glucose-6-phosphatase, catalytic, 2 [Source:HGNC Symbol;Acc:28906] [ENSMMUT00000019414]	0.0242727	0.0039255	0.046508	0.00729911	1.91606	0.0338678
13318	A_01_P1707331	C18H18orf34	ENSMMUT00000006149	ref|PREDICTED: Macaca mulatta uncharacterized protein C18orf34-like (C18H18orf34), mRNA [XM_002800904]	0.0179942	0.00100887	0.0344553	0.00603425	1.9148	0.0247309
4368	A_01_P1786741	A_01_P1786741	A_01_P1786741	Unknown	0.158447	0.011517	0.303292	0.0598844	1.91415	0.0384627
10401	A_01_P1771641	A_01_P1771641	A_01_P1771641	Unknown	0.019731	0.00107263	0.037754	0.00544534	1.91344	0.012489
8037	A_01_P1755416	ENSMMUT00000041983	ENSMMUT00000041983	ens|unc-5 homolog C (C. elegans) [Source:HGNC Symbol;Acc:12569] [ENSMMUT00000041983]	0.0182567	0.000851414	0.0349103	0.0073858	1.91219	0.0448893
26371	A_01_P011737	A_01_P011737	A_01_P011737	Unknown	1.59526	0.319507	3.0443	0.315916	1.90834	0.0256276
19311	A_01_P1765116	LOC710342	ENSMMUT00000024316	gb|ILLUMIGEN_MCQ_43514 Katze_MMJJ Macaca mulatta cDNA clone IBIUW:26279 5' similar to Bases 4 to 936 highly similar to human BCLP (Hs.424931), mRNA sequence [CO726147]	0.388919	0.0495878	0.741498	0.125806	1.90656	0.032791
32866	A_01_P015737	GABRA1	ENSMMUT00000010193	ens|Gamma-aminobutyric acid GABA-A receptor alpha 1 [Source:UniProtKB/TrEMBL;Acc:Q646U2] [ENSMMUT00000010193]	0.019708	0.00192623	0.0375663	0.00744071	1.90615	0.0431027
17140	A_01_P1731106	ENSMMUT00000033212	ENSMMUT00000033212	Unknown	0.017399	0.000973512	0.0331507	0.0060189	1.90532	0.0284502
3685	A_01_P1781821	A_01_P1781821	A_01_P1781821	Unknown	0.0200745	0.000697796	0.0382223	0.00808179	1.90402	0.0446623
1140	A_01_P1767941	LOC718159	ENSMMUT00000006826	ref|PREDICTED: Macaca mulatta protein S100-A15A-like (LOC718159), mRNA [XM_001110484]	0.0275192	0.00399935	0.0522947	0.00777783	1.90029	0.0274945
4639	A_01_P009718	LOC707681	ENSMMUT00000018721	ref|PREDICTED: Macaca mulatta para-hydroxybenzoate--polyprenyltransferase, mitochondrial-like (LOC707681), mRNA [XM_002808408]	14.0061	1.25293	26.5889	4.00431	1.89838	0.0185443
41503	A_01_P1778681	A_01_P1778681	A_01_P1778681	Unknown	0.38436	0.0114796	0.728675	0.105534	1.89581	0.0119498
7212	A_01_P1760111	LOC100424745	ENSMMUT00000021742	ref|PREDICTED: Macaca mulatta intersectin-1-like (LOC100424745), mRNA [XM_002803162]	0.0204562	0.00126897	0.0387623	0.00627649	1.89489	0.020291
28585	A_01_P1825901	LOC698908	XM_001087389	ref|PREDICTED: Macaca mulatta galactoside-binding soluble lectin 13-like, transcript variant 1 (LOC698908), mRNA [XM_001087389]	0.0319253	0.00526203	0.060363	0.00943335	1.89076	0.0367233
32540	A_01_P1745276	ENSMMUT00000040304	ENSMMUT00000040304	ens|synaptosomal-associated protein, 91kDa homolog (mouse) [Source:HGNC Symbol;Acc:14986] [ENSMMUT00000040304]	0.0315672	0.00346869	0.0594893	0.00764554	1.88453	0.0143851
3811	A_01_P1753691	GABRA6	ENSMMUT00000004011	ref|PREDICTED: Macaca mulatta gamma-aminobutyric acid (GABA) A receptor, alpha 6 (GABRA6), mRNA [XM_001086065]	0.021435	0.00125884	0.0403303	0.00702547	1.88152	0.0263672
38205	A_01_P1708410	GUCY2D	ENSMMUT00000024908	ref|PREDICTED: Macaca mulatta guanylate cyclase 2D, membrane (retina-specific) (GUCY2D), mRNA [XM_001111670]	0.020728	0.00267841	0.039	0.00499323	1.88151	0.0175721
32865	A_01_P1745846	ZC3H12D	ENSMMUT00000021028	ref|PREDICTED: Macaca mulatta zinc finger CCCH-type containing 12D (ZC3H12D), mRNA [XM_001087043]	0.0243005	0.00278606	0.045668	0.00454216	1.8793	0.00811239
16048	A_01_P1757256	CHL1	ENSMMUT00000001906	ref|PREDICTED: Macaca mulatta cell adhesion molecule with homology to L1CAM (close homolog of L1) (CHL1), mRNA [XM_001097680]	0.0218878	0.00160933	0.041132	0.00278614	1.87922	0.00138675
20556	A_01_P1807091	A_01_P1807091	A_01_P1807091	Unknown	0.023163	0.00154657	0.043522	0.00326143	1.87894	0.0015973
20240	A_01_P1796036	A_01_P1796036	A_01_P1796036	Unknown	0.0222085	0.00405234	0.041718	0.00359525	1.87847	0.0183013
7394	A_01_P1821126	A_01_P1821126	A_01_P1821126	Unknown	0.0346735	0.00247501	0.064972	0.0133775	1.87382	0.0471609
21544	A_01_P1756406	ENSMMUT00000025395	ENSMMUT00000025395	Unknown	0.0389268	0.00402067	0.072829	0.0139266	1.87092	0.0431059
38434	A_01_P010136	A_01_P010136	A_01_P010136	Unknown	0.40071	0.0585912	0.746634	0.137607	1.86328	0.0497926
33613	A_01_P1777507	A_01_P1777507	A_01_P1777507	Unknown	0.0351695	0.00465198	0.0654333	0.0108771	1.86051	0.0360123
17703	A_01_P1697481	TPH1	S83361	gb|Macaca mulatta tryptophan hydroxylase (TPH) mRNA, partial cds. [S83361]	0.0337143	0.00647046	0.06266	0.00465592	1.85856	0.019896
8195	A_01_P1739391	LOC698513	ENSMMUT00000020003	ref|PREDICTED: Macaca mulatta protein FAM83H-like (LOC698513), mRNA [XM_001087137]	0.0247223	0.00306727	0.0458967	0.0026425	1.85649	0.00416626
29558	A_01_P1671211	MAMU-DQA1	NM_001134295	ref|Macaca mulatta major histocompatibility complex, class II, DQ alpha 1 (MAMU-DQA1), mRNA [NM_001134295]	5.01425	0.164034	9.30447	1.88347	1.8556	0.0426767
15788	A_01_P1728831	ENSMMUT00000028970	ENSMMUT00000028970	Unknown	0.0203155	0.00153137	0.037651	0.00542442	1.85331	0.0164317
15408	A_01_P013026	ENSMMUT00000025156	ENSMMUT00000025156	ens|DEAH (Asp-Glu-Ala-His) box polypeptide 37 [Source:HGNC Symbol;Acc:17210] [ENSMMUT00000025156]	2.33296	0.239126	4.32292	0.828631	1.85298	0.045016
34847	A_01_P011130	CDH7	NM_001193994	ref|Macaca mulatta cadherin 7, type 2 (CDH7), mRNA [NM_001193994]	0.0215343	0.00155489	0.0398853	0.00379311	1.85218	0.00409533
44193	A_01_P017926	LOC708713	ENSMMUT00000016152	ref|PREDICTED: Macaca mulatta coiled-coil domain-containing protein 134-like, transcript variant 2 (LOC708713), mRNA [XM_002798372]	1.56013	0.18863	2.889	0.395153	1.85176	0.0207476
1219	A_01_P000358	CDHR5	ENSMMUT00000044836	Unknown	0.0497807	0.0109588	0.0921177	0.0105712	1.85047	0.0429202
37963	A_01_P1712711	MYLK3	ENSMMUT00000027809	ref|PREDICTED: Macaca mulatta myosin light chain kinase 3 (MYLK3), mRNA [XM_001113601]	0.0824788	0.00488823	0.152495	0.0241548	1.8489	0.0207607
19699	A_01_P1826551	A_01_P1826551	A_01_P1826551	Unknown	0.074026	0.0128726	0.136478	0.012485	1.84365	0.0196421
5374	A_01_P1694006	DQ148201	DQ148201	gb|Macaca mulatta clone ss1_p07_t7_430 3' UTR. [DQ148201]	0.0593165	0.014831	0.109329	0.00468673	1.84315	0.0388364
18006	A_01_P017044	CCDC87	ENSMMUT00000007753	ref|PREDICTED: Macaca mulatta coiled-coil domain-containing protein 87-like (LOC713677), mRNA [XM_001109501]	0.018948	0.000877575	0.0349153	0.00621471	1.84269	0.0297073
2273	A_01_P1804931	A_01_P1804931	A_01_P1804931	Unknown	0.054664	0.0073856	0.100694	0.0160912	1.84205	0.035083
31671	A_01_P1711526	ZNF598	ENSMMUT00000028132	Unknown	0.02675	0.00506915	0.049268	0.00472982	1.84179	0.0258489
21421	A_01_P1791516	A_01_P1791516	A_01_P1791516	Unknown	0.0664177	0.0130163	0.122133	0.00733645	1.83886	0.020096
24831	A_01_P1820771	LOC100425067	XM_002799928	ref|PREDICTED: Macaca mulatta hypothetical protein LOC100425067 (LOC100425067), mRNA [XM_002799928]	2.11077	0.504103	3.87867	0.171294	1.83756	0.0345096
9079	A_01_P015878	TRYX3	ENSMMUT00000041650	ref|PREDICTED: Macaca mulatta trypsin X3, transcript variant 1 (TRYX3), mRNA [XM_001085477]	0.03626	0.00409572	0.0666097	0.00797359	1.837	0.0142829
22079	A_01_P1718591	ENSMMUT00000005462	ENSMMUT00000005462	Unknown	0.063078	0.0105567	0.115849	0.0154056	1.8366	0.0322526
23184	A_01_P1804241	A_01_P1804241	A_01_P1804241	Unknown	0.0174993	0.000950703	0.0321253	0.00663558	1.83581	0.04931
42016	A_01_P1714516	C13orf31	NM_001193989	ref|Macaca mulatta chromosome 13 open reading frame 31 (C13orf31), mRNA [NM_001193989]	0.307732	0.0220439	0.564307	0.0854318	1.83376	0.0198442
22426	A_01_P1677036	NKX2-1	ENSMMUT00000015975	ens|NKX2-4 [Source:UniProtKB/TrEMBL;Acc:A2D648] [ENSMMUT00000015975]	0.0211103	0.00191568	0.038587	0.00739097	1.82788	0.0452305
36161	A_01_P1791951	A_01_P1791951	A_01_P1791951	Unknown	2.38818	0.0653328	4.34836	0.893755	1.82078	0.0478159
33123	A_01_P1777366	A_01_P1777366	A_01_P1777366	Unknown	0.0213748	0.00437797	0.0388967	0.00488453	1.81975	0.0451208
32872	A_01_P1727556	ENSMMUT00000043702	ENSMMUT00000043702	ens|transmembrane protease, serine 5 [Source:HGNC Symbol;Acc:14908] [ENSMMUT00000043702]	0.085725	0.0168258	0.15565	0.0207653	1.81569	0.0456261
14084	A_01_P1750151	LOC706133	ENSMMUT00000028061	gb|PREDICTED: Macaca mulatta 60S ribosomal protein L37-like (LOC694791), mRNA [XM_002804199]	138.722	26.0807	250.307	36.3177	1.80438	0.0496394
2815	A_01_P016566	LOC694819	ENSMMUT00000017264	gb|PREDICTED: Macaca mulatta bifunctional purine biosynthesis protein PURH-like (LOC694819), mRNA [XM_002808023]	27.5752	2.25306	49.6439	9.63535	1.80031	0.0483009
19328	A_01_P1791251	A_01_P1791251	A_01_P1791251	Unknown	0.111212	0.00753991	0.199993	0.038473	1.79832	0.0449939
21312	A_01_P1726286	LOC696911	ENSMMUT00000033173	Unknown	0.0202813	0.00260784	0.0364313	0.0043366	1.79631	0.0194446
3647	A_01_P1694206	DQ148257	DQ148257	gb|Macaca mulatta clone ss1_e22_t7_496 3' UTR. [DQ148257]	0.0273073	0.00238555	0.0490187	0.00532214	1.79508	0.00919016
21185	A_01_P1734671	LOC100423415	ENSMMUT00000021688	ref|PREDICTED: Macaca mulatta hypothetical protein LOC100423415 (LOC100423415), mRNA [XM_002798851]	0.0216815	0.0041076	0.03891	0.00392855	1.79462	0.0323923
9616	A_01_P1804706	A_01_P1804706	A_01_P1804706	Unknown	0.0199828	0.00143097	0.0357807	0.00696906	1.79058	0.0481363
37539	A_01_P1806006	A_01_P1806006	A_01_P1806006	Unknown	0.063817	0.0120507	0.114032	0.0144311	1.78685	0.0434234
19768	A_01_P1731411	FGF6	ENSMMUT00000017471	ref|PREDICTED: Macaca mulatta fibroblast growth factor 6 (FGF6), mRNA [XM_001099809]	0.0568943	0.00546322	0.101638	0.0152883	1.78644	0.026192
16043	A_01_P1815256	ADSL	DQ147954	gb|Macaca mulatta clone ds2_n18_t7_072 adenylosuccinate lyase (ADSL) mRNA, partial cds. [DQ147954]	1.00161	0.146292	1.7887	0.237847	1.78583	0.0306483
22905	A_01_P1702916	LOC721843	ENSMMUT00000000391	ref|PREDICTED: Macaca mulatta fibronectin type III and SPRY domain-containing protein 1-like (LOC721843), mRNA [XM_001118039]	0.0203632	0.00192873	0.0363017	0.0057999	1.7827	0.0310758
17722	A_01_P1699956	ENSMMUT00000047922	ENSMMUT00000047922	Unknown	0.425758	0.0147975	0.758433	0.0581164	1.78137	0.00134463
7320	A_01_P008423	DNASE1	ENSMMUT00000030765	Unknown	1.57605	0.120304	2.80404	0.243722	1.77915	0.00432965
9256	A_01_P1769471	TMCC2	ENSMMUT00000014665	ref|PREDICTED: Macaca mulatta transmembrane and coiled-coil domain family 2, transcript variant 3 (TMCC2), mRNA [XM_001094361]	0.0672565	0.0152589	0.119531	0.00434793	1.77724	0.0363187
10951	A_01_P1762771	ARHGEF5	ENSMMUT00000014152	Unknown	0.0706265	0.00374343	0.125493	0.016304	1.77685	0.012303
4771	A_01_P1808666	A_01_P1808666	A_01_P1808666	Unknown	0.0285992	0.00315587	0.050581	0.00917536	1.76861	0.0497336
12550	A_01_P016674	RHOG	NM_001194601	ref|Macaca mulatta ras homolog gene family, member G (rho G) (RHOG), mRNA [NM_001194601]	112.168	15.6656	198.304	31.8661	1.76792	0.0452807
2372	A_01_P1772496	A_01_P1772496	A_01_P1772496	Unknown	0.0282455	0.00573254	0.0499337	0.00360904	1.76785	0.0329705
36937	A_01_P1770386	METTL13	ENSMMUT00000010153	ref|PREDICTED: Macaca mulatta methyltransferase like 13 (METTL13), mRNA [XM_001100091]	3.72215	0.491496	6.56829	0.663531	1.76465	0.0165615
39063	A_01_P1714121	LOC721488	ENSMMUT00000031816	ref|PREDICTED: Macaca mulatta potassium-transporting ATPase alpha chain 2-like (LOC721488), mRNA [XM_001117656]	0.0272988	0.0046824	0.048142	0.000910122	1.76352	0.0136119
25037	A_01_P001992	LOC695816	ENSMMUT00000027025	ref|PREDICTED: Macaca mulatta hypothetical LOC695816, transcript variant 2 (LOC695816), mRNA [XM_002802365]	2.90109	0.669925	5.11495	0.38783	1.76311	0.0491485
28621	A_01_P1712951	ENSMMUT00000016778	ENSMMUT00000016778	ref|PREDICTED: Macaca mulatta probable G-protein coupled receptor 114-like (LOC711378), partial mRNA [XM_001100162]	0.706592	0.122264	1.24515	0.161672	1.7622	0.0418094
36877	A_01_P1726701	LOC717806	ENSMMUT00000025935	ref|PREDICTED: Macaca mulatta putative olfactory receptor 52P1-like (LOC717806), mRNA [XM_001112685]	0.0221588	0.00226777	0.0389267	0.00697602	1.75672	0.0476537
42644	A_01_P1706016	SIGLEC11	ENSMMUT00000038412	ref|PREDICTED: Macaca mulatta sialic acid binding Ig-like lectin 11, transcript variant 2 (SIGLEC11), mRNA [XM_001115795]	1.57182	0.192075	2.75386	0.262224	1.75202	0.013404
16164	A_01_P1700766	LOC719827	ENSMMUT00000026698	ref|PREDICTED: Macaca mulatta UPF0249 protein ydjC homolog (LOC719827), partial mRNA [XM_001114556]	1.97043	0.295968	3.44187	0.529821	1.74676	0.0479767
32241	A_01_P1718756	DNAJB7	ENSMMUT00000026865	ref|PREDICTED: Macaca mulatta DnaJ (Hsp40) homolog, subfamily B, member 7 (DNAJB7), mRNA [XM_001102579]	0.0225395	0.00367033	0.0392447	0.00414142	1.74115	0.0298633
38646	A_01_P002261	LOC709320	ENSMMUT00000031416	ref|PREDICTED: Macaca mulatta uncharacterized protein C21orf56-like, transcript variant 1 (LOC709320), mRNA [XM_001098710]	0.071051	0.0145196	0.123584	0.00790884	1.73937	0.0356781
39536	A_01_P1670206	CNP	NM_001035528	ref|Macaca mulatta 2',3'-cyclic nucleotide 3' phosphodiesterase (CNP), mRNA [NM_001035528]	0.734725	0.0311262	1.27604	0.216367	1.73676	0.0326229
42708	A_01_P011615	ENSMMUT00000005540	ENSMMUT00000005540	gb|PREDICTED: Macaca mulatta ferritin light chain-like (LOC718777), mRNA [XM_002799226]	550.523	39.9694	955.713	175.364	1.73601	0.0466181
35066	A_01_P001413	ENSMMUT00000014009	ENSMMUT00000014009	ens|zinc finger protein 680 [Source:HGNC Symbol;Acc:26897] [ENSMMUT00000014009]	1.26807	0.161384	2.19542	0.321812	1.7313	0.0375744
36904	A_01_P019996	GPR180	ENSMMUT00000018328	ref|PREDICTED: Macaca mulatta G protein-coupled receptor 180, transcript variant 2 (GPR180), mRNA [XM_001083934]	0.0299785	0.00557336	0.0518967	0.00146309	1.73113	0.0222506
25474	A_01_P1725926	SLC35C1	ENSMMUT00000044109	Unknown	3.58809	0.111232	6.18639	1.14452	1.72415	0.0433945
7523	A_01_P1819056	LOC705840	XR_012390	ref|PREDICTED: Macaca mulatta 28S ribosomal protein S5, mitochondrial-like (LOC705840), miscRNA [XR_012390]	19.1989	2.41257	32.9576	3.92359	1.71664	0.0250187
7485	A_01_P019631	PSD4	ENSMMUT00000016217	ref|PREDICTED: Macaca mulatta pleckstrin and Sec7 domain containing 4, transcript variant 2 (PSD4), mRNA [XM_001092314]	7.57274	0.748322	12.993	1.95814	1.71576	0.0333763
37982	A_01_P1775361	CN645536	CN645536	gb|ILLUMIGEN_MCQ_24151 Katze_MMSP Macaca mulatta cDNA clone IBIUW:10352 5' similar to Bases 415 to 965 highly similar to human Unigene Hs.146317, mRNA sequence [CN645536]	0.0570165	0.00458279	0.0976977	0.0126745	1.7135	0.0189271
35896	A_01_P1784411	A_01_P1784411	A_01_P1784411	Unknown	0.0269822	0.00415251	0.0462153	0.00468694	1.71281	0.0281177
33073	A_01_P1679786	P2RY2	ENSMMUT00000026955	gb|PREDICTED: Macaca mulatta purinergic receptor P2Y, G-protein coupled, 2 (P2RY2), mRNA [XM_001115229]	0.648909	0.122936	1.10755	0.0930693	1.70678	0.038912
15582	A_01_P008817	C20H16orf13	NM_001204163	ref|Macaca mulatta human chromosome 16 open reading frame 13 ortholog (C20H16orf13), mRNA [NM_001204163]	25.1065	1.89535	42.8211	7.42501	1.70558	0.0437073
39945	A_01_P1725486	ENSMMUT00000044304	ENSMMUT00000044304	Unknown	9.24397	1.76385	15.735	1.06591	1.7022	0.0354045
23355	A_01_P1779806	A_01_P1779806	A_01_P1779806	Unknown	0.0198295	0.00215318	0.033741	0.00564202	1.70156	0.0486328
28922	A_01_P1802171	BRWD1	XM_001108760	ref|PREDICTED: Macaca mulatta bromodomain and WD repeat domain containing 1, transcript variant 2 (BRWD1), mRNA [XM_001108760]	1.49274	0.274468	2.53763	0.200974	1.69998	0.0355233
32079	A_01_P1751106	TRMT61A	ENSMMUT00000039459	Unknown	0.53341	0.0242405	0.906069	0.155319	1.69864	0.0379787
12257	A_01_P019303	CN641708	CN641708	gb|ILLUMIGEN_MCQ_5226 Katze_MMBR Macaca mulatta cDNA clone IBIUW:6022 5' similar to Bases 139 to 413 highly similar to human Unigene Hs.513139, mRNA sequence [CN641708]	2.05236	0.301301	3.47771	0.211972	1.6945	0.0158802
29391	A_01_P1734901	PDIA6	ENSMMUT00000018047	gb|PREDICTED: Macaca mulatta protein disulfide isomerase family A, member 6, transcript variant 2 (PDIA6), mRNA [XM_002799141]	95.014	7.87637	160.478	17.2062	1.68899	0.0124067
15180	A_01_P1776517	LOC722265	XR_014732	ref|PREDICTED: Macaca mulatta peptidyl-prolyl cis-trans isomerase A-like (LOC722265), miscRNA [XR_014732]	64.2642	8.11925	108.307	8.51318	1.68533	0.0142533
17071	A_01_P1731121	JAKMIP3	ENSMMUT00000031454	ref|PREDICTED: Macaca mulatta Janus kinase and microtubule interacting protein 3 (JAKMIP3), mRNA [XM_002805866]	0.0329482	0.00602998	0.0555183	0.00463018	1.68502	0.0389003
10311	A_01_P003678	HDHD3	NM_001194198	ref|Macaca mulatta haloacid dehalogenase-like hydrolase domain containing 3 (HDHD3), mRNA [NM_001194198]	3.84932	0.288057	6.46572	0.906651	1.67971	0.0254883
12827	A_01_P1814866	ENSMMUT00000015552	ENSMMUT00000015552	ens|Diazepam-binding protein [Source:UniProtKB/TrEMBL;Acc:Q3I226] [ENSMMUT00000015552]	20.776	0.993705	34.6596	5.97617	1.66825	0.0426323
624	A_01_P1740626	ENSMMUT00000048008	ENSMMUT00000048008	ens|IQ motif and Sec7 domain 2 [Source:HGNC Symbol;Acc:29059] [ENSMMUT00000048008]	8.82163	1.63366	14.705	1.13257	1.66693	0.041134
2072	A_01_P1739491	ARHGAP39	ENSMMUT00000038748	ref|PREDICTED: Macaca mulatta Rho GTPase activating protein 39, transcript variant 1 (ARHGAP39), mRNA [XM_001095036]	0.0783897	0.0085485	0.130591	0.00304439	1.66592	0.00408844
37050	A_01_P1831576	LOC715723	ENSMMUT00000024494	Unknown	1.05624	0.189671	1.75361	0.133497	1.66023	0.0388144
472	A_01_P1752856	ZNF474	ENSMMUT00000029539	ref|PREDICTED: Macaca mulatta zinc finger protein 474 (ZNF474), mRNA [XM_001089304]	0.0298195	0.00379032	0.049488	0.0069642	1.65959	0.0440846
18379	A_01_P1810251	A_01_P1810251	A_01_P1810251	Unknown	0.116904	0.0105466	0.193872	0.0162165	1.65838	0.00869386
43409	A_01_P004529	LOC710249	ENSMMUT00000024318	ref|PREDICTED: Macaca mulatta neuron-specific calcium-binding protein hippocalcin-like, transcript variant 1 (LOC710249), mRNA [XM_001098851]	2.03655	0.131719	3.37533	0.351459	1.65737	0.0100931
40390	A_01_P001126	A_01_P001126	A_01_P001126	Unknown	0.499378	0.0592052	0.826413	0.117634	1.65489	0.0424207
3779	A_01_P1764136	PRAMEF22	ENSMMUT00000010448	ref|PREDICTED: Macaca mulatta PRAME family member 22 (PRAMEF22), mRNA [XM_001106795]	0.0308338	0.00362256	0.0510043	0.00750607	1.65417	0.0452708
35485	A_01_P020186	ENSMMUT00000041549	ENSMMUT00000041549	Unknown	0.883968	0.0858685	1.45888	0.238046	1.65038	0.0499512
2954	A_01_P1716856	HM13	ENSMMUT00000007221	gb|PREDICTED: Macaca mulatta histocompatibility (minor) 13, transcript variant 2 (HM13), mRNA [XM_001110638]	44.5492	3.04199	73.4968	8.36334	1.64979	0.0143113
36992	A_01_P1716851	HM13	ENSMMUT00000007220	gb|PREDICTED: Macaca mulatta histocompatibility (minor) 13, transcript variant 2 (HM13), mRNA [XM_001110638]	46.2888	3.95563	76.2935	10.7024	1.6482	0.0311687
30260	A_01_P008482	PTPRD	ENSMMUT00000009729	Unknown	0.198632	0.0135197	0.326937	0.0441404	1.64594	0.0243196
12339	A_01_P1737016	ENSMMUT00000014783	ENSMMUT00000014783	ens|mannosyl (alpha-1,6-)-glycoprotein beta-1,6-N-acetyl-glucosaminyltransferase [Source:HGNC Symbol;Acc:7049] [ENSMMUT00000014783]	0.355828	0.0475838	0.585559	0.0767519	1.64562	0.0432989
44777	A_01_P009579	ENSMMUT00000015552	ENSMMUT00000015552	ens|Diazepam-binding protein [Source:UniProtKB/TrEMBL;Acc:Q3I226] [ENSMMUT00000015552]	54.3355	4.80161	89.3327	13.2717	1.6441	0.0377319
8072	A_01_P1757526	SFMBT1	ENSMMUT00000020383	ref|PREDICTED: Macaca mulatta Scm-like with four mbt domains 1, transcript variant 7 (SFMBT1), mRNA [XM_001084999]	0.717109	0.0466398	1.17853	0.123375	1.64344	0.0109368
6737	A_01_P1718351	LOC716252	ENSMMUT00000044088	Unknown	0.037101	0.00683111	0.060953	0.00506667	1.64289	0.0474752
21893	A_01_P014003	GRWD1	XM_001113650	ref|PREDICTED: Macaca mulatta glutamate-rich WD repeat containing 1 (GRWD1), mRNA [XM_001113650]	3.89196	0.477766	6.39142	0.694209	1.64221	0.0273502
32696	A_01_P1730091	ALDH18A1	ENSMMUT00000004389	ref|PREDICTED: Macaca mulatta aldehyde dehydrogenase 18 family, member A1, transcript variant 2 (ALDH18A1), mRNA [XM_001099461]	0.833087	0.0358204	1.36788	0.144624	1.64194	0.00872855
671	A_01_P1724901	ENSMMUT00000032624	ENSMMUT00000032624	ens|T-cell, immune regulator 1, ATPase, H+ transporting, lysosomal V0 subunit A3 [Source:HGNC Symbol;Acc:11647] [ENSMMUT00000032624]	132.833	4.7138	217.91	34.1262	1.64048	0.032844
31247	A_01_P1777036	LOC719940	XM_002803241	ref|PREDICTED: Macaca mulatta peptidyl-prolyl cis-trans isomerase A-like (LOC719940), mRNA [XM_002803241]	3.19272	0.488523	5.2363	0.623948	1.64007	0.0468834
861	A_01_P012526	ARSH	XM_001116139	ref|PREDICTED: Macaca mulatta arylsulfatase family, member H (ARSH), mRNA [XM_001116139]	0.770791	0.026816	1.26408	0.141416	1.63998	0.0100514
33105	A_01_P1689716	NEK10	ENSMMUT00000045320	Unknown	0.47927	0.0177073	0.783065	0.0691265	1.63387	0.00432703
41953	A_01_P1776951	A_01_P1776951	A_01_P1776951	Unknown	1.24004	0.161862	2.02298	0.176094	1.63138	0.0229431
8156	A_01_P005204	EXOSC5	ENSMMUT00000020132	ref|PREDICTED: Macaca mulatta exosome component 5 (EXOSC5), mRNA [XM_001102687]	8.63533	0.589454	14.084	1.86902	1.63097	0.0244771
793	A_01_P000605	HYI	ENSMMUT00000033319	Unknown	66.9605	5.01353	109.006	5.72507	1.62791	0.00268386
19570	A_01_P1824561	LOC699475	XM_001092212	ref|PREDICTED: Macaca mulatta hypothetical LOC699475 (LOC699475), mRNA [XM_001092212]	0.0278	0.00524502	0.0452393	0.0016637	1.62731	0.0406973
38830	A_01_P019396	A_01_P019396	A_01_P019396	Unknown	7.29526	0.506599	11.8622	1.88174	1.62602	0.0422276
32268	A_01_P1762986	SHH	ENSMMUT00000041478	Unknown	2.07117	0.117891	3.35888	0.311637	1.62173	0.00732637
6003	A_01_P1772566	YPEL5	NM_001194271	ref|Macaca mulatta yippee-like 5 (Drosophila) (YPEL5), mRNA [NM_001194271]	16.6017	2.20951	26.8899	1.80591	1.61971	0.0191011
2726	A_01_P001221	LOC717335	XM_001108728	ref|PREDICTED: Macaca mulatta heparan sulfate glucosamine 3-O-sulfotransferase 6-like (LOC717335), mRNA [XM_001108728]	3.12807	0.23931	5.05793	0.593164	1.61695	0.019726
13297	A_01_P1716436	RPN2	ENSMMUT00000044862	gb|PREDICTED: Macaca mulatta ribophorin II (RPN2), mRNA [XM_001097464]	70.8723	6.32935	114.395	15.8395	1.6141	0.0354393
15124	A_01_P017367	WDR4	ENSMMUT00000002190	Unknown	5.88026	0.399865	9.47033	0.958287	1.61053	0.0119241
6715	A_01_P1821111	GRIN3A	ENSMMUT00000023436	ref|PREDICTED: Macaca mulatta glutamate receptor, ionotropic, N-methyl-D-aspartate 3A (GRIN3A), mRNA [XM_001107918]	0.0739853	0.00935614	0.119103	0.0110838	1.60982	0.0261267
25033	A_01_P020027	ECT2	ENSMMUT00000045672	ref|PREDICTED: Macaca mulatta epithelial cell transforming sequence 2 oncogene (ECT2), mRNA [XM_001083830]	1.06547	0.118435	1.71485	0.245848	1.60948	0.0477209
8381	A_01_P013625	A_01_P013625	A_01_P013625	Unknown	0.17884	0.0176869	0.287837	0.042123	1.60947	0.0449241
14182	A_01_P1739536	ZBED1	ENSMMUT00000010509	ref|PREDICTED: Macaca mulatta zinc finger, BED-type containing 1 (ZBED1), mRNA [XM_002806123]	3.61077	0.522044	5.7957	0.00413343	1.60511	0.016612
550	A_01_P1778771	A_01_P1778771	A_01_P1778771	Unknown	1.70059	0.214937	2.72122	0.0962716	1.60017	0.0122985
33842	A_01_P1700441	LOC722886	ENSMMUT00000019499	ref|PREDICTED: Macaca mulatta PI-PLC X domain-containing protein 1-like (LOC722886), partial mRNA [XM_001118970]	2.07636	0.270693	3.32175	0.275083	1.5998	0.0251608
26235	A_01_P012187	PLAC1	NM_001194091	ref|Macaca mulatta placenta-specific 1 (PLAC1), mRNA [NM_001194091]	0.121698	0.0118085	0.194043	0.0247035	1.59446	0.033797
37621	A_01_P002596	LOC711788	ENSMMUT00000001265	gb|PREDICTED: Macaca mulatta ribosome biogenesis regulatory protein homolog (LOC711788), mRNA [XM_001100635]	5.53411	0.175637	8.82184	1.31483	1.59408	0.032379
14973	A_01_P004490	C8orf46	ENSMMUT00000031535	ens|chromosome 8 open reading frame 46 [Source:RefSeq peptide;Acc:NP_001181830] [ENSMMUT00000031535]	1.03503	0.0797373	1.64988	0.123177	1.59404	0.00701829
8750	A_01_P1805266	A_01_P1805266	A_01_P1805266	Unknown	0.947877	0.0959721	1.50947	0.205409	1.59247	0.0414592
31055	A_01_P1697476	S83356	S83356	gb|{pseudogene} psi tau protein pseudogene [Rhesus monkeys, brain, cerebral cortex, mRNA Partial, 1059 nt]. [S83356]	0.615436	0.059164	0.977923	0.0736609	1.58899	0.011565
43684	A_01_P1776291	A_01_P1776291	A_01_P1776291	Unknown	5.43072	0.598275	8.62134	1.03967	1.58751	0.0360351
34200	A_01_P1734516	AACS	ENSMMUT00000015536	ref|PREDICTED: Macaca mulatta acetoacetyl-CoA synthetase (AACS), mRNA [XM_001103579]	1.08087	0.118214	1.71391	0.15909	1.58568	0.0219885
1559	A_01_P1723756	TLE4	ENSMMUT00000045932	Unknown	1.13467	0.129913	1.79716	0.15628	1.58385	0.0218866
18244	A_01_P1732966	MARS	ENSMMUT00000015787	Unknown	0.273661	0.0363412	0.432145	0.0222269	1.57912	0.0196121
15447	A_01_P1681806	GRIP1	ENSMMUT00000023372	ref|PREDICTED: Macaca mulatta glutamate receptor interacting protein 1, transcript variant 2 (GRIP1), mRNA [XM_001117113]	0.0701165	0.0107499	0.110341	0.00671562	1.57368	0.034077
4567	A_01_P1814151	LOC702452	ENSMMUT00000011463	ref|PREDICTED: Macaca mulatta protein NDRG3-like (LOC709601), partial mRNA [XM_001098144]	0.244343	0.0259156	0.383873	0.0482176	1.57104	0.040141
39635	A_01_P1710711	ENSMMUT00000041039	ENSMMUT00000041039	ens|galactokinase 1 [Source:HGNC Symbol;Acc:4118] [ENSMMUT00000041039]	9.13707	0.298275	14.256	1.6714	1.56024	0.0164
21799	A_01_P1802776	A_01_P1802776	A_01_P1802776	Unknown	8.2763	0.831946	12.912	0.848169	1.56011	0.0123719
2043	A_01_P010905	FANCG	ENSMMUT00000028406	ref|PREDICTED: Macaca mulatta Fanconi anemia, complementation group G, transcript variant 2 (FANCG), mRNA [XM_001092322]	21.2561	0.754568	33.1552	4.4222	1.5598	0.0260648
1751	A_01_P007086	ENSMMUT00000004573	ENSMMUT00000004573	ens|F-box and leucine-rich repeat protein 19 [Source:HGNC Symbol;Acc:25300] [ENSMMUT00000004573]	39.0066	0.941448	60.6754	9.06724	1.55552	0.0368456
35494	A_01_P1714931	RNF219	ENSMMUT00000016387	Unknown	0.375912	0.00863553	0.583346	0.0783425	1.55182	0.0260469
9920	A_01_P1805721	LOC708572	XM_001097053	ref|PREDICTED: Macaca mulatta hypothetical LOC708572 (LOC708572), mRNA [XM_001097053]	0.0721472	0.00346422	0.111859	0.00802914	1.55043	0.00394546
19736	A_01_P1674596	MAPK7	ENSMMUT00000011932	ens|MAPK7 [Source:UniProtKB/TrEMBL;Acc:Q8MJ91] [ENSMMUT00000011932]	0.136288	0.0128224	0.211018	0.0276653	1.54832	0.0427735
22146	A_01_P1818841	ENSMMUT00000014783	ENSMMUT00000014783	ens|mannosyl (alpha-1,6-)-glycoprotein beta-1,6-N-acetyl-glucosaminyltransferase [Source:HGNC Symbol;Acc:7049] [ENSMMUT00000014783]	4.91316	0.48724	7.60672	0.601362	1.54823	0.0169166
33149	A_01_P1690916	ENSMMUT00000009354	ENSMMUT00000009354	ens|chondroitin polymerizing factor 2 [Source:HGNC Symbol;Acc:29270] [ENSMMUT00000009354]	7.6138	0.821192	11.7808	1.19747	1.5473	0.0305975
41530	A_01_P1678696	SIGMAR1	ENSMMUT00000029220	ref|PREDICTED: Macaca mulatta sigma non-opioid intracellular receptor 1, transcript variant 5 (SIGMAR1), mRNA [XM_001096077]	3.65587	0.409419	5.65453	0.29908	1.5467	0.0145091
40015	A_01_P1682821	LOC704637	ENSMMUT00000018042	ref|PREDICTED: Macaca mulatta fumarylacetoacetate hydrolase domain-containing protein 2A-like (LOC704637), mRNA [XM_002808045]	16.2791	1.67715	25.126	2.98948	1.54345	0.0393238
32648	A_01_P005754	TSSK2	ENSMMUT00000024450	ref|PREDICTED: Macaca mulatta testis-specific serine kinase 2 (TSSK2), mRNA [XM_001104572]	0.129399	0.01978	0.199539	0.0038328	1.54204	0.0311863
44159	A_01_P011205	ENSMMUT00000001359	ENSMMUT00000001359	ens|integrin, beta 2 (complement component 3 receptor 3 and 4 subunit) [Source:HGNC Symbol;Acc:6155] [ENSMMUT00000001359]	278.897	6.48295	429.406	60.5797	1.53966	0.0324031
11288	A_01_P007110	GCDH	ENSMMUT00000038710	ref|PREDICTED: Macaca mulatta glutaryl-Coenzyme A dehydrogenase, transcript variant 3 (GCDH), mRNA [XM_001110430]	7.58285	1.17152	11.6737	0.479032	1.53948	0.0364572
5517	A_01_P1715876	ENSMMUT00000045122	ENSMMUT00000045122	Unknown	11.9116	1.59988	18.3323	1.8494	1.53903	0.0467496
37815	A_01_P017357	LOC709285	ENSMMUT00000020564	Unknown	1.56109	0.103926	2.39998	0.322681	1.53737	0.0367708
22799	A_01_P018597	ST3GAL2	ENSMMUT00000022465	Unknown	0.2514	0.0312337	0.386009	0.04282	1.53544	0.0473688
14627	A_01_P1675801	LOC696428	ENSMMUT00000028212	ref|PREDICTED: Macaca mulatta HEAT repeat-containing protein 3-like (LOC696428), mRNA [XM_002808298]	1.86542	0.0446004	2.86377	0.353185	1.53519	0.0208715
10548	A_01_P009995	PLXNA3	XM_001094198	ref|PREDICTED: Macaca mulatta plexin A3, transcript variant 1 (PLXNA3), mRNA [XM_001094198]	29.2059	1.90561	44.8228	6.42287	1.53472	0.0438296
18055	A_01_P1758416	CHRD	ENSMMUT00000045828	Unknown	0.0891157	0.0108609	0.136718	0.0136109	1.53416	0.0392568
41548	A_01_P1678937	ENSMMUT00000033279	ENSMMUT00000033279	Unknown	0.524692	0.052577	0.803725	0.104056	1.5318	0.047801
25544	A_01_P1714471	SLC25A15	ENSMMUT00000043376	Unknown	0.0881553	0.0124829	0.134988	0.00934402	1.53125	0.0378851
35071	A_01_P017138	MAPBPIP	ENSMMUT00000045746	gb|PREDICTED: Macaca mulatta mitogen-activated protein-binding protein-interacting protein-like, transcript variant 2 (MAPBPIP), mRNA [XM_001116330]	91.2415	2.59987	139.325	15.2676	1.52699	0.0146011
36960	A_01_P008480	ENSMMUT00000019053	ENSMMUT00000019053	ref|PREDICTED: Macaca mulatta DNA (cytosine-5-)-methyltransferase 3 alpha, transcript variant 2 (DNMT3A), mRNA [XM_001083358]	23.699	2.3874	36.1632	3.46401	1.52594	0.0274765
22728	A_01_P1702636	LOC709219	ENSMMUT00000016706	Unknown	2.26672	0.215546	3.45868	0.427126	1.52585	0.0420262
8655	A_01_P1826526	A_01_P1826526	A_01_P1826526	Unknown	0.187771	0.0192065	0.286352	0.0239031	1.525	0.0225331
31093	A_01_P1819036	SLC1A4	XM_001082105	ref|PREDICTED: Macaca mulatta solute carrier family 1 (glutamate/neutral amino acid transporter), member 4 (SLC1A4), mRNA [XM_001082105]	1.65303	0.039405	2.52066	0.340327	1.52487	0.0298565
18472	A_01_P006482	TACR2	ENSMMUT00000021468	ref|PREDICTED: Macaca mulatta tachykinin receptor 2, transcript variant 2 (TACR2), mRNA [XM_002805698]	0.571435	0.077458	0.870263	0.0235072	1.52294	0.0243201
24212	A_01_P002422	KRT7	NM_001193952	ref|Macaca mulatta keratin 7 (KRT7), mRNA [NM_001193952]	1.38867	0.103867	2.112	0.285673	1.52088	0.0432261
22661	A_01_P008006	VPS18	ENSMMUT00000040795	Unknown	8.31596	1.05499	12.63	1.01855	1.51876	0.0356453
34887	A_01_P1807606	C6H5orf43	NM_001190845	ref|Macaca mulatta chromosome 5 open reading frame 43 ortholog (C6H5orf43), mRNA [NM_001190845]	11.789	0.683585	17.8482	2.08364	1.51397	0.0252963
890	A_01_P1689181	FYCO1	ENSMMUT00000033179	Unknown	2.82452	0.289157	4.27549	0.329575	1.51371	0.0214281
40623	A_01_P000143	LPCAT1	ENSMMUT00000007321	Unknown	21.9439	0.876002	33.1966	4.52758	1.51279	0.0351891
5568	A_01_P1812241	A_01_P1812241	A_01_P1812241	Unknown	0.0334752	0.0048594	0.0505877	0.00197834	1.5112	0.0354037
22151	A_01_P012969	A_01_P012969	A_01_P012969	Unknown	3.4807	0.166354	5.25631	0.67078	1.51013	0.0306029
41939	A_01_P1782946	A_01_P1782946	A_01_P1782946	Unknown	11.4427	0.86169	17.2169	0.729139	1.50462	0.00463351
35727	A_01_P006520	A_01_P006520	A_01_P006520	Unknown	0.561125	0.0581645	0.844244	0.0585642	1.50456	0.0203012
6768	A_01_P1781946	A_01_P1781946	A_01_P1781946	Unknown	36.5671	3.93138	55.0116	4.76613	1.5044	0.0297417
32623	A_01_P1683396	C8orf46	ENSMMUT00000038997	ens|chromosome 8 open reading frame 46 [Source:RefSeq peptide;Acc:NP_001181830] [ENSMMUT00000038997]	0.540108	0.0572758	0.812322	0.0297165	1.504	0.0130097
16474	A_01_P1803861	A_01_P1803861	A_01_P1803861	Unknown	0.135231	0.00800502	0.203329	0.0278763	1.50357	0.0425182
3785	A_01_P004822	MAN1B1	ENSMMUT00000011244	gb|PREDICTED: Macaca mulatta mannosidase, alpha, class 1B, member 1, transcript variant 2 (MAN1B1), mRNA [XM_001091256]	18.1777	2.14157	27.3104	2.96387	1.50241	0.0496784
18648	A_01_P1765132	AK2	ENSMMUT00000008795	Unknown	16.0062	1.16373	24.0402	3.08749	1.50193	0.0405714
